# Supplementary material for: Anti-corrosion porous RuO2/NbC anodes for the electrochemical oxidation of phenol
Source: Royal Society of Chemistry journal article supplement (doi:10.1039/c9ra03353j), 2019-01-01
Supplement: c9ra03353j1.pdf [file c9ra03353j1.pdf]

## Supplementary data for

### Anti-corrosion porous RuO<sub>2</sub>/NbC anodes for the electrochemical oxidation of phenol

Jing Ma<sup>a</sup>, Guotong Qin<sup>a\*</sup>, Wei Wei<sup>b</sup>, Tianliang Xiao<sup>a</sup>, Shaomin Liu<sup>c</sup>, Lei Jiang<sup>a</sup>

<sup>a</sup>*Key Laboratory of Bio-Inspired Smart Interfacial Science and Technology of Ministry of Education, Beihang University, Shahe Campus, Beijing 102206, China.*

<sup>b</sup>*College of Biochemical Engineering, Beijing Union University, 18 Sanqu Fatouxili, Chaoyang District, Beijing 100023, China*

<sup>c</sup>*Department of Chemical Engineering, Curtin University, Perth, Western Australia 6845, Australia*

---

\* Corresponding author.

Email address: qingt@buaa.edu.cn

Tel: +86-10-61716768.

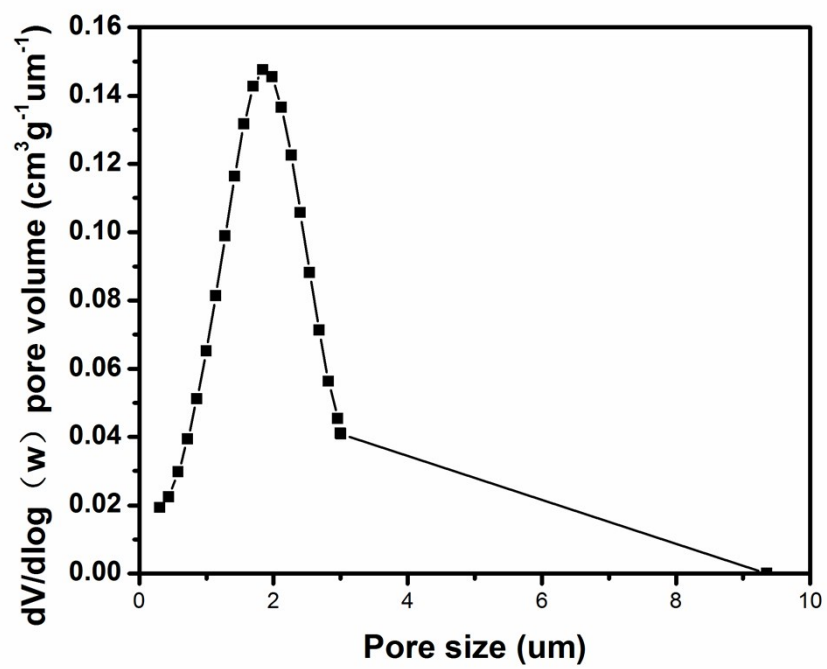

Fig. S1. Pore size distribution of NbC.

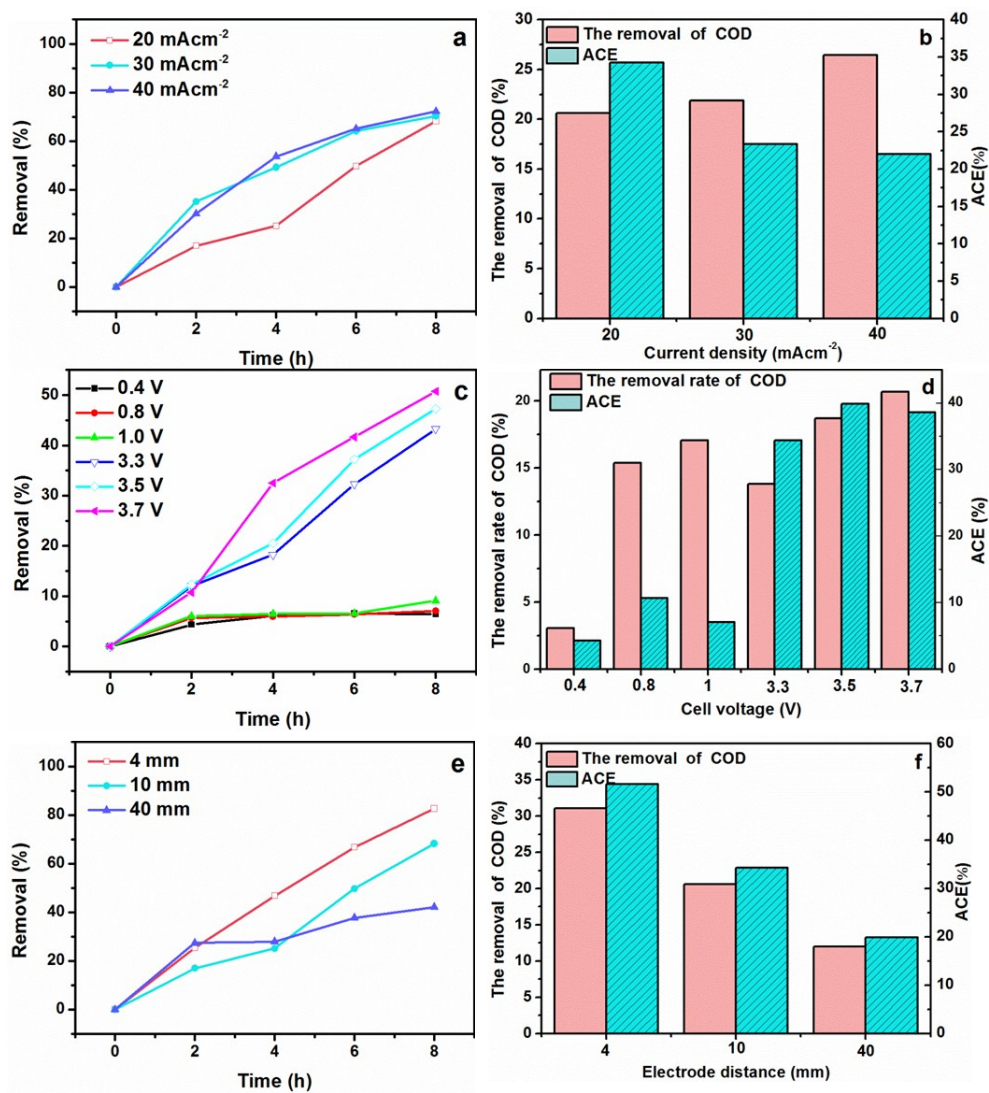

**Fig. S2** The effects of current density on phenol removal (a), COD removal and ACE at 8 h (b) with an initial phenol concentration of 100 mg L<sup>-1</sup>. The effect of cell voltage on phenol removal (c), COD removal and ACE at 8 h (d) with an initial phenol concentration of 100 mg L<sup>-1</sup>. The effect of electrode distance on phenol removal (e), COD removal and ACE at 8 h (f) with a current density of 20 mA cm<sup>-2</sup> and an initial phenol concentration of 100 mg L<sup>-1</sup>.

**Table S1** The atomic ratio of Ru with different coating times detected by EDS.

| Samples            | The atomic ratio of Ru(%) |
|--------------------|---------------------------|
| One coating time   | 0.56                      |
| Two coating time   | 0.49                      |
| There coating time | 1.20                      |
| Four coating time  | 2.13                      |

## Calculation equation

The mineralization current efficiency (MCE) was calculated using Eq. (S1)

$$\text{MCE} = \frac{nFV(\text{TOC}_0 - \text{TOC}_t)}{4.32 \times 10^7 \text{ mIt}} \times 100 \quad (\text{S1})$$

$$\text{Compound removal rate} = \frac{(C_0 - C_t) \times V}{S \times t} \quad (\text{S2})$$

$$\text{COD removal rate} = \frac{(\text{COD}_0 - \text{COD}_t) \times V}{S \times t} \quad (\text{S3})$$

$$\text{TOC removal rate} = \frac{(\text{TOC}_0 - \text{TOC}_t) \times V}{S \times t} \quad (\text{S4})$$

where  $C_0$  and  $C_t$  are the concentrations of pollutants ( $\text{mg L}^{-1}$ ) in solution at the initial time and time  $t$  (h), respectively,  $\text{COD}_0/\text{TOC}_0$  and  $\text{COD}_t/\text{TOC}_t$  are the chemical oxygen demand or the total organic carbon concentration ( $\text{mg L}^{-1}$ ) at the initial time and time  $t$  (h), respectively,  $I$  is the current (A),  $F$  is the Faraday constant ( $96485 \text{ C mol}^{-1}$ ),  $V$  is the volume of electrolyte (L),  $S$  is the electrode area ( $\text{cm}^2$ ),  $8$  is the equivalent mass of oxygen ( $\text{geq}^{-1}$ ),  $4.32 \times 10^7$  is a conversion factor to convert to the same units ( $3600 \text{ s h}^{-1} \times 12,000 \text{ mg of C mol}^{-1}$ ),  $m$  is the number of pollutant carbon atoms, and  $(n)$  is the number of electrons consumed per molecule of pollutant.
